# Supplementary material for: Constitutive activation of the ERK pathway in melanoma and skin melanocytes in Grey horses
Source: PubMed Central journal article supplement (PMC4254013; doi:10.1186/1471-2407-14-857), 2014-11-21

**A**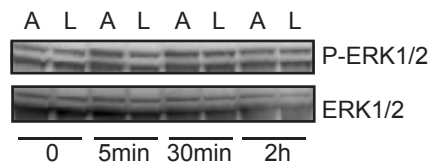**B**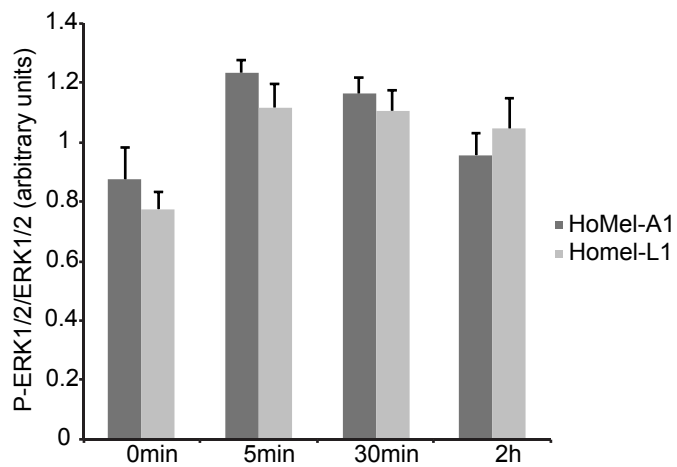

Supplement: 12885_2013_5052_MOESM2_ESM.pdf [file 12885_2013_5052_MOESM2_ESM.pdf]
